# Supplementary material for: Emerging Risks in Food: Probiotic Enterococci Pose a Threat to Public Health through the Food Chain
Source: MDPI journal article supplement (doi:10.3390/foods10112846), 2021-11-18
Supplement: s1 [file s1]

**Table S1.** Information of probiotic enterococcal isolates used for different application targets

| Code of product | Origin      | Name  | Species           | Amount per serving                                   | Application targets |
|-----------------|-------------|-------|-------------------|------------------------------------------------------|---------------------|
| 1               | Beijing     | Efm1  | <i>E. faecium</i> | Unknown                                              | Human               |
| 2               | Beijing     | Efm2  | <i>E. faecium</i> | Unknown                                              | Human               |
| 3               | Switzerland | Efm3  | <i>E. faecium</i> | Unknown                                              | Human               |
| 4               | Japan       | Efm4  | <i>E. faecium</i> | 2×10 <sup>5</sup> -4×10 <sup>8</sup> CFUs per tablet | Human               |
| 5               | Taiwan      | Efm5  | <i>E. faecium</i> | Unknown                                              | Human               |
| 6               | Jiangsu     | Efm6  | <i>E. faecium</i> | Unknown                                              | Companion animal    |
| 7               | Jiangsu     | Efm7  | <i>E. faecium</i> | 1.0×10 <sup>10</sup> CFU/g                           | Companion animal    |
| 8               | Japan       | Efm8  | <i>E. faecium</i> | 300 billion/bag                                      | Companion animal    |
| 9               | Taiwan      | Efm9  | <i>E. faecium</i> | ≥100 billion/g                                       | Livestock           |
| 10              | Taiwan      | Efm10 | <i>E. faecium</i> | ≥2 billion/g                                         | Livestock           |
| 11              | Henan       | Efm11 | <i>E. faecium</i> | ≥5 billion/g                                         | Aquaculture         |
| 11              | Henan       | Efm12 | <i>E. faecium</i> | ≥5 billion/g                                         | Livestock           |
| 12              | Shandong    | Efm13 | <i>E. faecium</i> | ≥4.5×10 <sup>10</sup> CFU/g                          | Livestock           |
| 13              | Henan       | Efm14 | <i>E. faecium</i> | Unknown                                              | Livestock           |
| 14              | Jiangsu     | Efm15 | <i>E. faecium</i> | ≥1 billion/g                                         | Livestock           |
| 15              | Liaoning    | Efm16 | <i>E. faecium</i> | Unknown                                              | Livestock           |
| 16              | Jiangsu     | Efm17 | <i>E. faecium</i> | Unknown                                              | Livestock           |
| 17              | Liaoning    | Efm18 | <i>E. faecium</i> | ≥10 billion/g                                        | Livestock           |
| 18              | Hebei       | Efm19 | <i>E. faecium</i> | 3-10 billion/g                                       | Livestock           |
| 19              | Shandong    | Efm20 | <i>E. faecium</i> | 3-10 billion/g                                       | Livestock           |
| 20              | Guangdong   | Efm21 | <i>E. faecium</i> | Unknown                                              | Livestock           |
| 21              | Hubei       | Efm22 | <i>E. faecium</i> | ≥10 billion/g                                        | Livestock           |
| 22              | Jiangsu     | Efm23 | <i>E. faecium</i> | Unknown                                              | Livestock           |

|    |           |       |                   |                            |                  |
|----|-----------|-------|-------------------|----------------------------|------------------|
| 23 | Henan     | Efm24 | <i>E. faecium</i> | ≥500 million/g             | Livestock        |
| 24 | Shandong  | Efm25 | <i>E. faecium</i> | Unknown                    | Livestock        |
| 25 | Jiangxi   | Efm26 | <i>E. faecium</i> | ≥10 billion/g              | Livestock        |
| 26 | Jiangxi   | Efm27 | <i>E. faecium</i> | Unknown                    | Livestock        |
| 26 | Jiangxi   | Efm28 | <i>E. faecium</i> | ≥1×10 <sup>10</sup> CFU/g  | Livestock        |
| 27 | Beijing   | Efm29 | <i>E. faecium</i> | 30 billion/g               | Livestock        |
| 28 | Henan     | Efm30 | <i>E. faecium</i> | ≥10 billion/g              | Livestock        |
| 29 | Guangdong | Efm31 | <i>E. faecium</i> | Unknown                    | Livestock        |
| 30 | Jiangsu   | Efm32 | <i>E. faecium</i> | Unknown                    | Livestock        |
| 31 | Henan     | Efm33 | <i>E. faecium</i> | ≥1.6×10 <sup>9</sup> CFU/g | Livestock        |
| 31 | Henan     | Efm34 | <i>E. faecium</i> | ≥1.6×10 <sup>9</sup> CFU/g | Livestock        |
| 32 | Jiangxi   | Efm35 | <i>E. faecium</i> | Unknown                    | Aquaculture      |
| 33 | Hubei     | Efm36 | <i>E. faecium</i> | Unknown                    | Aquaculture      |
| 34 | Beijing   | Efm37 | <i>E. faecium</i> | 20 billion/g               | Aquaculture      |
| 35 | Guangdong | Efm38 | <i>E. faecium</i> | Unknown                    | Aquaculture      |
| 36 | Hubei     | Efm39 | <i>E. faecium</i> | Unknown                    | Aquaculture      |
| 37 | Beijing   | Efm40 | <i>E. faecium</i> | ≥7.5×10 <sup>7</sup> CFU/g | Companion animal |
| 38 | Beijing   | Efm41 | <i>E. faecium</i> | ≥1×10 <sup>7</sup> CFU/g   | Companion animal |
| 39 | Jilin     | Efm42 | <i>E. faecium</i> | ≥1.0×10 <sup>8</sup> CFU/g | Livestock        |
| 40 | Jilin     | Efm43 | <i>E. faecium</i> | ≥1.0×10 <sup>8</sup> CFU/g | Livestock        |
| 41 | USA       | Efm44 | <i>E. faecium</i> | ≥2×10 <sup>7</sup> CFU/g   | Companion animal |
| 42 | Hebei     | Efm45 | <i>E. faecium</i> | ≥1×10 <sup>9</sup> CFU/g   | Companion animal |
| 42 | Hebei     | Efm46 | <i>E. faecium</i> | ≥1×10 <sup>9</sup> CFU/g   | Companion animal |
| 43 | Henan     | Efm47 | <i>E. faecium</i> | ≥2×10 <sup>10</sup> CFU/g  | Companion animal |

|    |          |       |                   |                                 |                  |
|----|----------|-------|-------------------|---------------------------------|------------------|
| 44 | UK       | Efm48 | <i>E. faecium</i> | $\geq 2 \times 10^8$ CFU/g      | Companion animal |
| 44 | UK       | Efm49 | <i>E. faecium</i> | $\geq 2 \times 10^8$ CFU/g      | Companion animal |
| 45 | USA      | Efm50 | <i>E. faecium</i> | $\geq 2.5 \times 10^{11}$ CFU/g | Companion animal |
| 46 | Hunan    | Efm51 | <i>E. faecium</i> | $\geq 4.2 \times 10^8$ CFU/g    | Companion animal |
| 46 | Hunan    | Efm52 | <i>E. faecium</i> | $\geq 4.2 \times 10^8$ CFU/g    | Companion animal |
| 47 | Hunan    | Efm53 | <i>E. faecium</i> | $\geq 1.8 \times 10^8$ CFU/g    | Companion animal |
| 48 | Jiangxi  | Efm54 | <i>E. faecium</i> | $\geq 1.8 \times 10^{10}$ CFU/g | Aquaculture      |
| 49 | Jiangxi  | Efm55 | <i>E. faecium</i> | $\geq 4.5 \times 10^9$ CFU/g    | Livestock        |
| 49 | Jiangxi  | Efm56 | <i>E. faecium</i> | $\geq 4.5 \times 10^9$ CFU/g    | Livestock        |
| 50 | Shandong | Efm57 | <i>E. faecium</i> | $\geq 1 \times 10^{10}$ CFU/g   | Livestock        |
| 51 | Henan    | Efm58 | <i>E. faecium</i> | $\geq 1 \times 10^6$ CFU/g      | Livestock        |
| 51 | Henan    | Efm59 | <i>E. faecium</i> | $\geq 1 \times 10^6$ CFU/g      | Livestock        |
| 52 | Henan    | Efm60 | <i>E. faecium</i> | $\geq 1 \times 10^6$ CFU/g      | Livestock        |
| 52 | Henan    | Efm61 | <i>E. faecium</i> | $\geq 1 \times 10^6$ CFU/g      | Livestock        |
| 52 | Henan    | Efm62 | <i>E. faecium</i> | $\geq 1 \times 10^6$ CFU/g      | Livestock        |
| 53 | Henan    | Efm63 | <i>E. faecium</i> | 100 billion/g                   | Livestock        |
| 53 | Henan    | Efm64 | <i>E. faecium</i> | 100 billion/g                   | Livestock        |
| 54 | Henan    | Efm65 | <i>E. faecium</i> | Unknown                         | Aquaculture      |
| 54 | Henan    | Efm66 | <i>E. faecium</i> | Unknown                         | Aquaculture      |
| 55 | Henan    | Efm67 | <i>E. faecium</i> | Unknown                         | Livestock        |
| 55 | Henan    | Efm68 | <i>E. faecium</i> | Unknown                         | Livestock        |
| 56 | Henan    | Efm69 | <i>E. faecium</i> | Unknown                         | Aquaculture      |
| 57 | Henan    | Efm70 | <i>E. faecium</i> | Unknown                         | Livestock        |
| 58 | Henan    | Efm71 | <i>E. faecium</i> | Unknown                         | Aquaculture      |

|    |          |       |                    |                          |             |
|----|----------|-------|--------------------|--------------------------|-------------|
| 58 | Henan    | Efm72 | <i>E. faecium</i>  | Unknown                  | Aquaculture |
| 59 | Henan    | Efm73 | <i>E. faecium</i>  | ≥10 billion/g            | Livestock   |
| 59 | Henan    | Efm74 | <i>E. faecium</i>  | ≥10 billion/g            | Livestock   |
| 60 | Henan    | Efm75 | <i>E. faecium</i>  | ≥10 billion/g            | Livestock   |
| 60 | Henan    | Efm76 | <i>E. faecium</i>  | ≥10 billion/g            | Livestock   |
| 61 | Henan    | Efm77 | <i>E. faecium</i>  | ≥10 billion/g            | Livestock   |
| 62 | Henan    | Efm78 | <i>E. faecium</i>  | ≥10 billion/g            | Livestock   |
| 63 | Jiangsu  | Efm79 | <i>E. faecium</i>  | Unknown                  | Livestock   |
| 64 | Henan    | Efm80 | <i>E. faecium</i>  | Unknown                  | Aquaculture |
| 65 | Henan    | Efm81 | <i>E. faecium</i>  | Unknown                  | Livestock   |
| 66 | Henan    | Efm82 | <i>E. faecium</i>  | Unknown                  | Aquaculture |
| 67 | Henan    | Efm83 | <i>E. faecium</i>  | ≥100 million/g           | Human       |
| 68 | Jiangsu  | Efm84 | <i>E. faecium</i>  | Unknown                  | Livestock   |
| 69 | Jiangsu  | Efm85 | <i>E. faecium</i>  | Unknown                  | Livestock   |
| 70 | Zhejiang | Efs1  | <i>E. faecalis</i> | ≥1×10 <sup>6</sup> CFU/g | Human       |
| 71 | Japan    | Efs2  | <i>E. faecalis</i> | Unknown                  | Human       |
| 72 | Shanghai | Efs3  | <i>E. faecalis</i> | Unknown                  | Human       |

---

Note: The same code of product trade means that strains are isolated from the same probiotic product.
