# Supplementary material for: Emerging Risks in Food: Probiotic Enterococci Pose a Threat to Public Health through the Food Chain
Source: MDPI journal article supplement (doi:10.3390/foods10112846), 2021-11-18
Supplement: s1 [file s1]

**Table S2.** Profiles of mobile genetic elements and virulence genes in probiotic enterococcal isolates used for different application targets

| Risk factors            |            | Application targets   |                |                  |
|-------------------------|------------|-----------------------|----------------|------------------|
| Mobile genetic elements | Human (9)  | Companion animal (15) | Livestock (50) | Aquaculture (14) |
| IS1485                  | 100% (9)   | 100% (15)             | 94% (47)       | 26% (13)         |
| IS1216V                 | 88.89% (8) | 40% (6)               | 30% (15)       | 18% (9)          |
| IS1542                  | 55.56% (5) | 93.33% (14)           | 80% (40)       | 8% (4)           |
| Tn1546                  | 66.67% (6) | 33.33% (5)            | 26% (13)       | 18% (9)          |
| pS177                   | 88.89% (8) | 40% (6)               | 25% (15)       | 18% (9)          |
| pEF418                  | 66.67% (6) | 33.33% (5)            | 26% (13)       | 16% (8)          |
| pNB2354p1               | 55.56% (5) | 40% (6)               | 28% (14)       | 18% (9)          |
| pNB18                   | 55.56% (5) | 66.67% (10)           | 62% (31)       | 8% (4)           |
| pGL                     | 22.22% (2) | 60% (9)               | 68% (34)       | 6% (3)           |
| pCIZ2                   | 22.22% (2) | 60% (9)               | 70% (35)       | 6% (3)           |
| Virulence genes         | Human (9)  | Companion animal (15) | Livestock (50) | Aquaculture (14) |
| ace/acm                 | 100% (9)   | 100% (15)             | 100% (50)      | 100% (14)        |
| cad                     | 100% (9)   | 100% (15)             | 100% (50)      | 100% (14)        |
| ebp                     | 100% (9)   | 93.33% (14)           | 98% (49)       | 100% (14)        |
| efaA                    | 100% (9)   | 100% (15)             | 100% (50)      | 100% (14)        |
| srt                     | 100% (9)   | 86.67% (13)           | 98% (49)       | 100% (14)        |
| scm                     | 44.44% (4) | 33.33% (5)            | 12% (6)        | 0% (0)           |
| sgrA                    | 22.22% (2) | 60% (9)               | 86% (43)       | 100% (14)        |
| bopD                    | 66.67% (6) | 100% (15)             | 100% (50)      | 100% (14)        |
| Gls24                   | 77.78% (7) | 93.33% (14)           | 100% (50)      | 100% (14)        |
| mreC                    | 66.67% (6) | 100% (15)             | 100% (50)      | 100% (14)        |
| prpA                    | 66.67% (6) | 100% (15)             | 100% (50)      | 100% (14)        |
