# Supplementary material for: Emerging Risks in Food: Probiotic Enterococci Pose a Threat to Public Health through the Food Chain
Source: MDPI journal article supplement (doi:10.3390/foods10112846), 2021-11-18
Supplement: s1 [file s1]

**Table S3.** Virulence genes of probiotic *E. faecalis* isolates.

| Virulence genes | <i>E. faecalis</i> 1 | <i>E. faecalis</i> 2 | <i>E. faecalis</i> 3 |
|-----------------|----------------------|----------------------|----------------------|
| ace             | +                    | +                    | +                    |
| cpd             | +                    | +                    | +                    |
| cad             | +                    | +                    | +                    |
| camE            | +                    | +                    | +                    |
| ebp             | +                    | +                    | +                    |
| efaA            | +                    | +                    | +                    |
| ElrA            | +                    | +                    | +                    |
| esp             | -                    | +                    | +                    |
| fsr             | +                    | +                    | +                    |
| gelE            | +                    | +                    | +                    |
| hyl             | +                    | +                    | +                    |
| srt             | +                    | +                    | +                    |
| tpx             | +                    | +                    | +                    |
| sprE            | +                    | +                    | +                    |
| ccf             | +                    | +                    | +                    |
| SigV            | +                    | +                    | +                    |
| Npr             | +                    | +                    | +                    |
| Gls24           | +                    | +                    | +                    |
| ecbA            | -                    | +                    | +                    |
| Cob1            | +                    | +                    | +                    |

+: indicating that this strain harbors the virulence gene; -: indicating that this strain doesn't harbor the virulence gene.
